# Supplementary material for: Nailing it: Investigation of elephant toenails for retrospective analysis of adrenal and reproductive hormones
Source: PubMed Central journal article supplement (PMC11295213; doi:10.1093/conphys/coae048), 2024-08-02
Supplement: web_material_coae048.pdf [file web_material_coae048.pdf]

## Supplementary Information

**Table S1.** Intra-assay and inter-assay coefficients of variation (%CV), based on interpolated hormone concentrations of African elephant and Asian elephant toenail extract pools. Intra-assay %CV is based on six replicates assayed in the same assay; inter-assay %CV is based on six replicates assayed in six different assays.

| Species          | Hormone               | Intra-assay %CV | Inter-assay %CV |
|------------------|-----------------------|-----------------|-----------------|
| African elephant | Progesterone          | 3.33%           | 3.57%           |
|                  | Testosterone          | 2.43%           | 3.13%           |
|                  | Cortisol              | 3.12%           | 4.81%           |
| Asian elephant   | Progesterone          | 3.25%           | 1.42%           |
|                  | Testosterone          | 0.83%           | 2.07%           |
|                  | Cortisol <sup>a</sup> | 3.77%           | 6.84%           |

<sup>a</sup>These assays utilized a 1:5 dilution of antibody and conjugate. See methods section for more information on this technique.

**Table S2.** Parallelism statistics for enzyme immunoassays for three steroid hormones in toenail extract of African and Asian elephants. Parallelism was assessed using an F-test, with a significance threshold (alpha) of 0.05.

| Species          | Hormone      | Sex         | Standard curve slope<br>(log[conc]/%Bound) | Sample pool slope<br>(log[conc]/%Bound) | P-value<br>(<0.05) |
|------------------|--------------|-------------|--------------------------------------------|-----------------------------------------|--------------------|
| African elephant | Progesterone | Female      | -43.90                                     | -45.99                                  | 0.7477             |
|                  |              | Male        | -60.86                                     | -70.62                                  | 0.1653             |
|                  | Testosterone | Female      | -34.33                                     | -41.32                                  | 0.0198             |
|                  |              | Male        | -34.66                                     | -37.52                                  | 0.1197             |
|                  | Cortisol     | Female/Male | -53.92                                     | -60.82                                  | 0.1148             |
| Asian elephant   | Progesterone | Female      | -64.03                                     | -65.88                                  | 0.6637             |
|                  |              | Male        | -64.03                                     | -53.51                                  | 0.1626             |
|                  | Testosterone | Female      | -37.66                                     | -47.89                                  | <0.0001            |
|                  |              | Male        | -37.66                                     | -51.39                                  | <0.0001            |
|                  | Cortisol     | Female/Male | -52.70                                     | -49.21                                  | 0.0604             |

**Table S3.** Results of assay accuracy testing for three hormones in toenail extract of African and Asian elephants. Slope was calculated from the line of apparent dose vs. relative dose of standards spiked with pooled extract, with apparent dose derived from comparison to unspiked standards. A slope within 0.7-1.3 and an  $r^2 > 0.95$  (best fit linear regression line) indicates acceptable accuracy.

| Accuracy pool    | Hormone pool | Dilution | Slope (0.7-1.3) | R <sup>2</sup> (>0.95) |
|------------------|--------------|----------|-----------------|------------------------|
| African elephant | Progesterone | 1:4      | 0.8326          | 0.9996                 |
|                  | Testosterone | 1:51     | 1.0650          | 0.9967                 |
|                  | Cortisol     | 1:4      | 1.0520          | 0.9956                 |
| Asian elephant   | Progesterone | 1:4      | 0.8219          | 0.9989                 |
|                  | Testosterone | 1:4      | 1.1600          | 0.9982                 |
|                  | Cortisol     | 1:1      | 0.9760          | 0.9996                 |

## Female elephant toenail testosterone compared to nearby musth

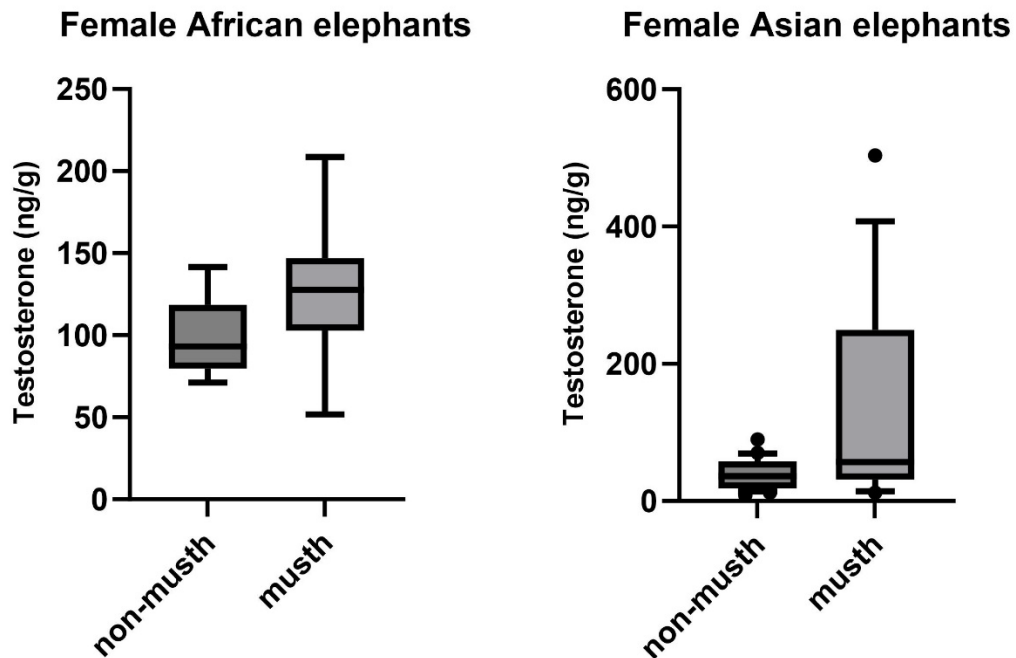

**Figure S1.** Concentrations of testosterone in collected female toenails when a male elephant housed as the same facility was in musth at the time of collection, compared to non-musth toenail samples. (Samples from known luteal phases for cycling female African elephant Felix were excluded, due to the documented positive correlation between progesterone and testosterone in female luteal phase samples.)
